# Supplementary material
Source: publisher figshare collection journal article supplement (https://future-science-group.figshare.com/ndownloader/files/34105550)
Supplement: Supplementary file 1 [file 34105550]

**Evaluation of specific training components**

|  | **n (%)** |
| --- | --- |
| How much did the story about the patient and his doctor help you understand the material covered in the course?  A little  Somewhat  A lot | 2 (8.7)  6 (26.1)  15 (65.2) |
| The presenter was not visible during the training. Would you have preferred to see the presenter?  No  Yes  No preference | 3 (13.0)  3 (13.0)  17 (73.9) |
| How useful to you was the matching exercise in helping you master genetics terminology?  Somewhat useful  Useful  Very useful | 1 (4.4)  9 (39.1)  13 (56.5) |
| How useful to you was the crossword puzzle exercise in helping you master genetics terminology?  A little useful  Somewhat useful  Useful  Very useful | 1 (4.4)  4 (17.4)  7 (30.4)  11 (47.8) |
| How useful to you was the short translation exercise in helping you master genetics terminology?  Not at all useful  A little useful  Useful  Very useful | 1 (4.4)  1 (4.4)  10 (43.5)  11 (47.8) |
